# Supplementary material for: SARS-CoV-2 proteins monitored by long-range surface plasmon field-enhanced Raman scattering with hybrid bowtie nanoaperture arrays and nanocavities
Source: Royal Society of Chemistry journal article supplement (doi:10.1039/d2lc01006b), 2022-12-20
Supplement: d2lc01006b1.pdf [file d2lc01006b1.pdf]

## Supplementary information (ESI)

# SARS-CoV-2 Protein Monitored by Long-Range Surface Plasmon Field-Enhanced Raman Scattering with hybrid bowtie nanoaperture arrays and nanocavities

Xiaojun Luo,<sup>a</sup> Weiling Yue,<sup>a</sup> Shutong Zhang,<sup>a</sup> Haopeng Liu,<sup>a</sup> Zhinan Chen,<sup>a</sup> Ling Qiao,<sup>b</sup> Panjie Li,<sup>c\*</sup>  
Caijun Wu<sup>a\*</sup> Yi He<sup>a\*</sup>

<sup>a</sup> *School of Science, Xihua University, Chengdu 610039, P. R. China*

<sup>b</sup> *Division of Chemistry and Biological Chemistry, School of Physical & Mathematical Sciences, Nanyang Technological University, Singapore 637371, Singapore*

<sup>c</sup> *School of Chemistry and Chemical Engineering, School of Environmental and Biological Engineering, Nanjing University of Science and Technology, Nanjing 210094, China*

### **Gene sequence of SARS-CoV-2 S protein**

QCVNLTTRTQLPPAYTNSFTRGVYYPDKVFRSSVLHSTQDLFLPFFSNVTWFHAIHVSGTNGTK  
RFDNPVLPFNDGVYFASTEKSNIIRGWIFGTTLDSTQSLIVNNAATNVVIKVFCEFCNDPFLG  
VYYHKNNKSWMESEFRVYSSANNCTFEYVSQPFLMDLEGKQGNFKNLREFVFKNIDGYFKIYS  
KHTPINLVRDLPQGFSALEPLVDLPIGINITRFQTLALHRSYLTPGDSSSGWTAGAAAYYVGYL  
QPRTFLLKYNENGTITDAVDCALDPLSETKCTLKSFTVEKGIYQTSNFRVQPTESIVRFPNITNLC  
PFGEVFNATRFASVYAWNRKRISNCVADYSVLVNSASFSTFKCYGVSPTKLNLDLCFTNVYADS  
FVIRGDEVQRQIAPGQTGKIADYNYKLPDDFTGCVIAWNSNNLDSKVGGNVNYLYRLFRKSNLK  
PFERDISTEIQAGSTPCNGVEGFNCYFPLQSYGFQPTNGVGYQPYRVVVLSEFLLHAPATVCG  
PKKSTNLVKNKCVNFNFNGLTGTGVLTESNKKFLPFQQFGRDIADTTDAVRDPQTLLEILDITPCS  
FGGVSVITPGTNTSNQVAVLYQDVNCTEVPVAIHADQLTPTWRVYSTGNSVFQTRAGCLIGAE  
HVNNSYECDIPIGAGICASYQTQTNPRRAR

### **Gene sequence of SARS-CoV-2 N protein**

MSDNGPQNQRNAPRITFGGSDSTGSNQNNGERSGARSKQRRPQGLPNNTASWFTALTQHGKED  
LKFPRGQGVPIINTNSSPDDQIGYYRRATRRIRGGDGKMKDLSPRWYFYLLGTGPEAGLPYGAN  
KDGIIWVATEGALNTPKDHIGTRNPANNAIIVLQPQGTTLPGFYAEGSRGGSQASSRSSSRSR  
NSSRNSTPGSSRGTSPARMAGNGGDAALALLLDRLNQLESKMSGKGQQQGGQTVTKKSAE  
ASKKPRQKRTATKAYNVTQAFGRRGPEQTQGNFGDQELIRQGTDYKHWPQIAQFAPSASAFFG  
MSRIGMEVTPSGTWLTYTGAIKLDDKDPNFKDQVILLNKHIDAYKTFPPTEPKKDKKKKADET  
QALPQRQKKQQTVTLLPAADLDDFSKQLQQSMSSADSTQA

## The calculation of the average distributed protein particles within the Raman-focused window

The irradiation radius ( $r$ ) of focus laser beam can be described as:<sup>1</sup>

$$r = \frac{1.22\lambda}{2NA}$$

where,  $\lambda$  represents excitation wavelength. N.A is the numerical aperture of the objective. Thus, the  $r$  of focus laser beam in our system is  $\sim 0.5 \mu\text{m}$ .

Because  $100 \mu\text{L}$  SARS-CoV-2 proteins were uniform distributed on  $1 \times 1 \text{ cm}^2$  substrate surface, the effective number of proteins ( $N$ ) within Raman-focused window can be calculated as follow:<sup>2</sup>

$$N = \frac{C \text{ g/mL}}{Mw \text{ g/mol}} \times 0.1 \text{ mL} \times \frac{3.14 \times 0.5 \mu\text{m} \times 0.5 \mu\text{m}}{1000 \mu\text{m} \times 1000 \mu\text{m}} \times NA$$

The Mw (molecular weight) of S protein is  $180 \text{ kDa}$  ( $1.8 \times 10^5 \text{ g/mol}$ ). NA (Avogadro constant) is  $6.02 \times 10^{23} \text{ mol}^{-1}$ .

[1] R. A. A'lvarez-Puebla, *J. Phys. Chem. Lett.*, 2012, **3**, 857–866.

[2] Y. Yang, Y. Peng, C. Lin, L. Long, J. Hu, J. He, H. Zeng, Z. Huang, Z.-Y. Li, M. Tanemura, J. Shi, J. R. Lombardi and X. Luo, *Nano-Micro Lett.*, 2021, **13**, 109.

| Raman bands (cm <sup>-1</sup> ) | Major Assignments                                    |
|---------------------------------|------------------------------------------------------|
| 640                             | Tyr ( $\alpha$ -helix)                               |
| 708                             | Phospholipids                                        |
| 740                             | Trp, C–C stretching                                  |
| 815                             | Tyr                                                  |
| 860                             | Tyr                                                  |
| 945                             | N–C <sub><math>\alpha</math></sub> –C                |
| 1045                            | C–N and C–C protein stretching                       |
| 1146                            | Gly                                                  |
| 1170                            | Tyr                                                  |
| 1262                            | $\alpha$ -helix amide III                            |
| 1325                            | $\alpha$ -helix amide III                            |
| 1358                            | C–H deformation, Trp                                 |
| 1400                            | C–H rocking in lipids                                |
| 1450                            | General fatty acids, C–H stretching of glycoproteins |
| 1565                            | Indole ring (Trp)                                    |
| 1610                            | Tyr, Trp, Phe                                        |

**Table S2. Raman bands of typical vibrational modes of N protein**

| Raman bands (cm <sup>-1</sup> ) | Major Assignments                                    |
|---------------------------------|------------------------------------------------------|
| 640                             | Tyr ( $\alpha$ -helix)                               |
| 708                             | Phospholipids                                        |
| 740                             | Trp, C–C stretching                                  |
| 815                             | Tyr                                                  |
| 860                             | $\beta$ -Sheet Tyr                                   |
| 1045                            | C–N and C–C protein stretching                       |
| 1262                            | Amide III                                            |
| 1358                            | C–H deformation, Trp                                 |
| 1400                            | C–H rocking in lipids                                |
| 1450                            | General fatty acids, C–H stretching of glycoproteins |
| 1565                            | Indole ring (Trp)                                    |
| 1660                            | Amide I                                              |

**Table S3. Raman bands of typical vibrational modes saliva sample**

| Raman bands (cm <sup>-1</sup> ) | Major Assignments                                               |
|---------------------------------|-----------------------------------------------------------------|
| 845                             | Ring breathing mode of tyrosine and C–C stretch of proline ring |
| 923                             | C–C stretching of proline ring/glucose/lactic acid              |
| 1130                            | C–C stretching of proteins and lipids                           |
| 1230                            | Amide III                                                       |
| 1279                            | Amide III, Phospholipid, proteins, lipids                       |
| 1360                            | Trp, porphyrins, lipids, proteins                               |
| 1434                            | CH <sub>2</sub> deformation of proteins and lipids              |
| 1534                            | Trp                                                             |
| 1640                            | CH <sub>2</sub> bending of Amide I and proteins                 |

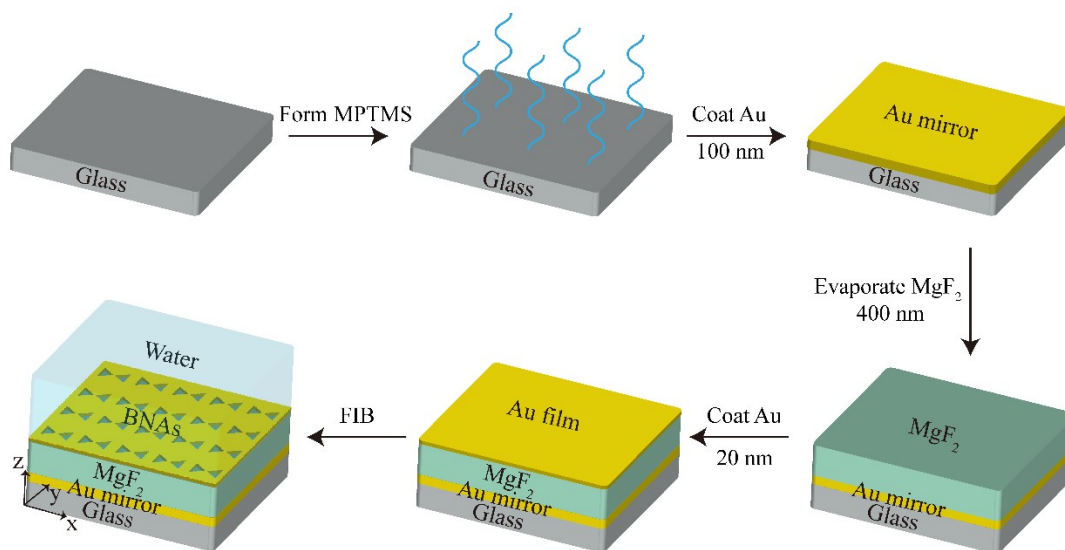

**Fig. S1.** Schematic illustration for the fabrication of BNAs + IMI + MIM substrates.

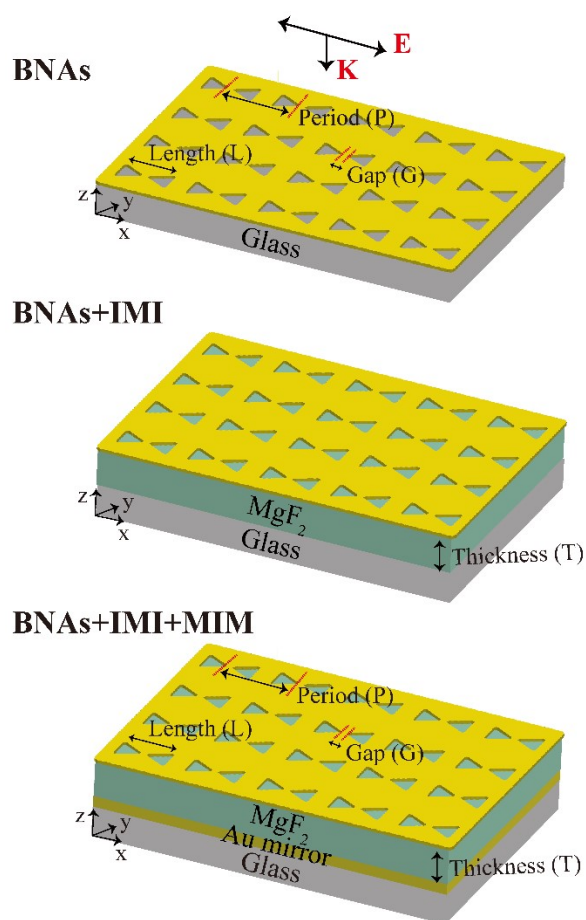

**Fig. S2.** 3D schematics for the three types of SERS substrates investigated in the FDTD simulations.

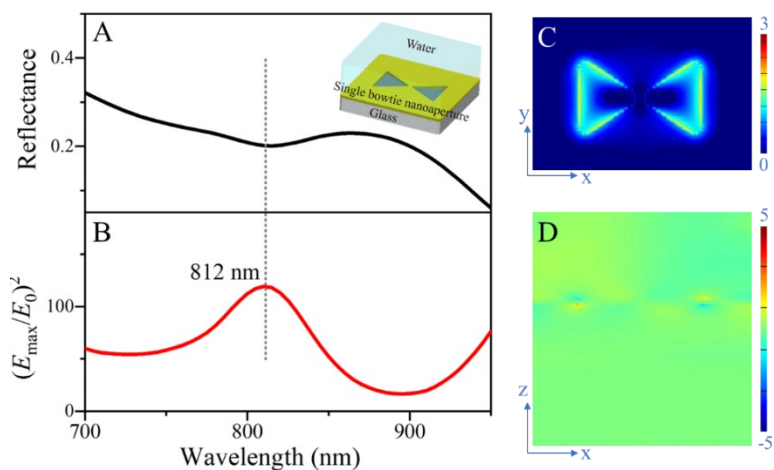

**Fig. S3.** (A) FDTD simulated reflectance and (B)  $(E_{\max}/E_0)^2$  intensity at the top Au/H<sub>2</sub>O interface as a function of waveSlength for a single bowtie nanoaperture. (C and D) The  $E$ -field profile at the top Au/water interface and  $E_z$  distribution at the cross-sectional  $x$ - $z$  plane at the wavelength of 812 nm. The scale bar in C represents  $(E_{\max}/E_0)^2$  on a log scale. The scale bar in D represents  $|E_z/E_0|$  on the normal scale.

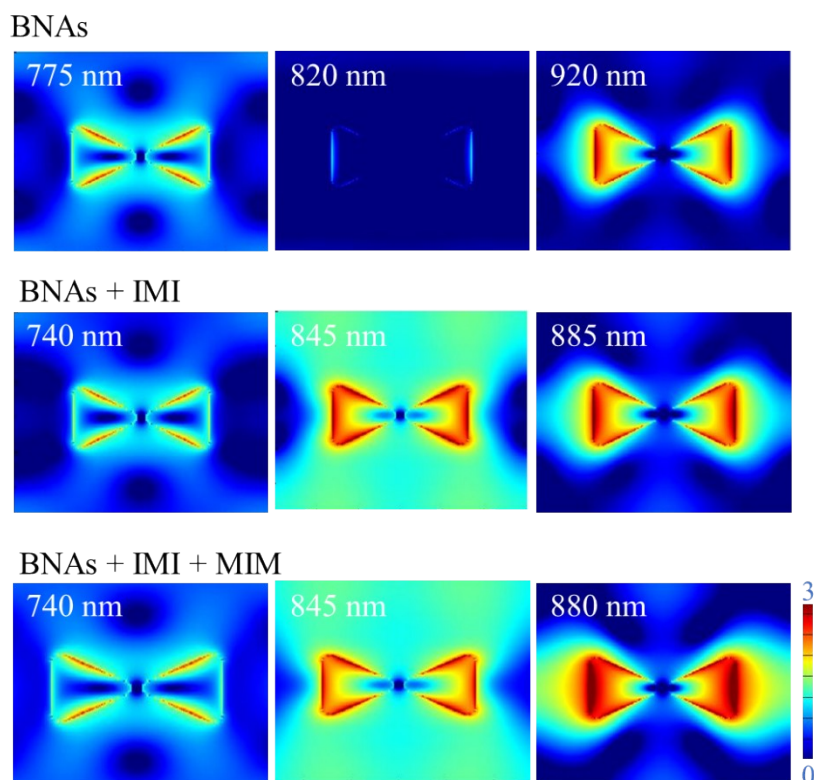

**Fig. S4.** FDTD simulated  $E$ -field distribution profiles for the three types of SERS substrates at the top Au/water interface at different resonance wavelength. The scale bar represents  $(E_{\max}/E_0)^2$  on a log scale.



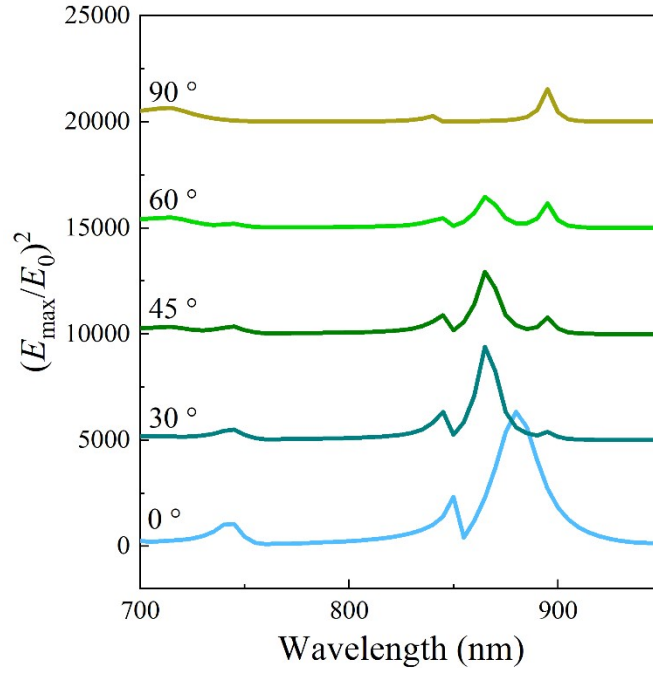

**Fig. S5.** FDTD simulated  $(E_{\max}/E_0)^2$  at the top Au/H<sub>2</sub>O interface as a function of wavelength for BNAs + IMI + MIM structure at different polarization directions.

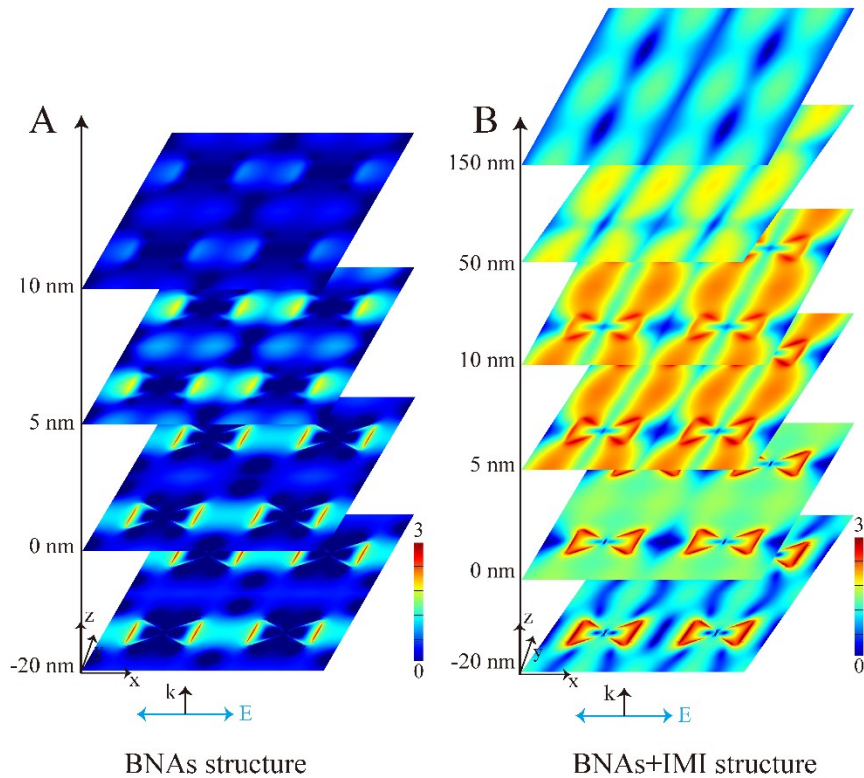

**Fig. S6.** FDTD simulated  $E$ -field distribution of  $x$ - $y$  plane at different vertical distance from the top surface at mode III of (A) BNAs, (B) BNAs + IMI structure.

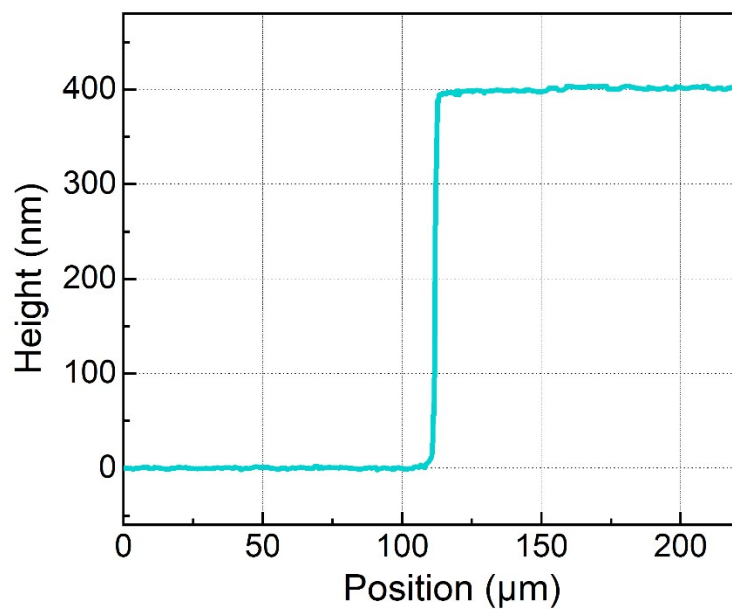

**Fig. S7.** Profilometer of  $\text{MgF}_2$  thickness.

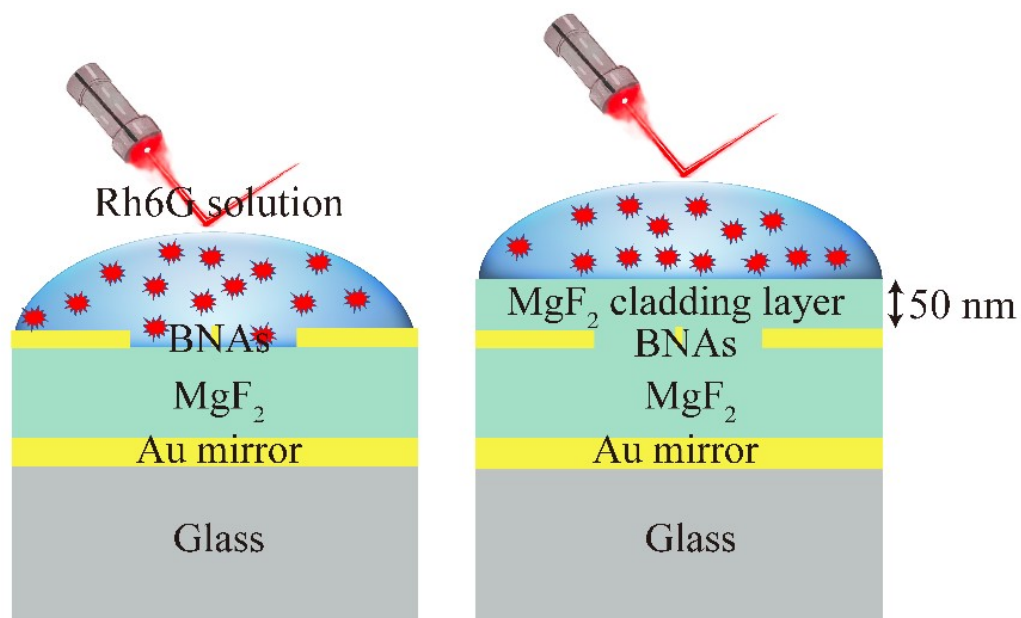

**Fig. S8.** Schematic illustration of Rh6G absorbed on the surface of the top Au/water interface (left) and absorbed on  $\text{MgF}_2$ /water interface with a  $\text{MgF}_2$  capping layer thickness of 50 nm (right).
